# Supplementary material for: Rational design of hydroxyapatite/graphite-supported bimetallic Cu–M (M = Cu, Fe, Co, Ni) catalysts for enhancing the partial hydrogenation of dimethyl oxalate to methyl glycolate
Source: Royal Society of Chemistry journal article supplement (doi:10.1039/d3cy00319a), 2023-01-01
Supplement: d3cy00319a1.pdf [file d3cy00319a1.pdf]

**Rational design of hydroxyapatite/graphite-supported bimetallic Cu-M (M = Cu, Fe, Co, Ni) catalysts for enhancing the partial hydrogenation of dimethyl oxalate to methyl glycolate**

Mohamed Abbas <sup>a,b,\*</sup>, JiaMing Wang <sup>c</sup>, Paweł Stelmachowski <sup>a</sup>, Jiangang Chen<sup>c,\*</sup> and Andrzej Kotarba <sup>a,\*</sup>

<sup>a</sup> Faculty of Chemistry, Jagiellonian University, Ul. Gronostajowa 2, Krakow, 30-387, Poland

<sup>b</sup> Ceramics Department, National Research Centre, El-Behouth Str., 12622 Cairo, Egypt

<sup>c</sup> State Key Laboratory of Coal Conversion, Institute of Coal Chemistry, Chinese Academy of Sciences, Taiyuan, 030001, China

**Corresponding author:**

**Prof. Dr. Andrzej Kotarba** (E-mail: kotarba@chemia.uj.edu.pl)

**Prof. Jiangang Chen** (E-mail: chenjg@sxicc.ac.cn)

**Prof. Mohamed Abbas** (E-mail: abbas@chemia.uj.edu.pl, mohamed\_abbas83@yahoo.com)

Address: Faculty of Chemistry, Jagiellonian University, Ul. Gronostajowa 2, Krakow, 30-387, Poland.

**Tel:** +48-126282586

Table S1 Physicochemical properties of the studied catalysts

| Types of catalyst | SBET<br>a (m <sup>2</sup> g) | Dpore<br>b (nm) | $\Phi_{WF}$ | Cu <sup>+</sup> /(Cu <sup>+</sup> +Cu <sup>0</sup> )<br>% |
|-------------------|------------------------------|-----------------|-------------|-----------------------------------------------------------|
| HAp/G/Cu 13       | 92                           | 64              | -           | 65.15                                                     |
| HAp/G/Cu 17       | 82                           | 68              | 4.7 eV      | 56.5                                                      |
| HAp/G/Cu 20       | 74                           | 55              | -           | 51                                                        |
| HAp/G/CuFe        | 102                          | 127             | 4.61 eV     | 59.15                                                     |
| HAp/G/CuCo        | 131                          | 350             | 4.83 eV     | 50                                                        |
| HAp/G/CuNi        | 154                          | 180             | 4.71 eV     | 16.27                                                     |

Table S 2 Binding energy (eV) value of Cu element and transition metals (Co,Fe and Ni) doped HAp/G/Cu catalysts (related to Fig. 9)

| Catalyst type | Cu                |        |                   |        | Co                |        |                   |        | Ni                |        |                   |        | Fe                |        |                   |        |
|---------------|-------------------|--------|-------------------|--------|-------------------|--------|-------------------|--------|-------------------|--------|-------------------|--------|-------------------|--------|-------------------|--------|
|               | 2p <sub>3/2</sub> |        | 2p <sub>1/2</sub> |        | 2p <sub>3/2</sub> |        | 2p <sub>1/2</sub> |        | 2p <sub>3/2</sub> |        | 2p <sub>1/2</sub> |        | 2p <sub>3/2</sub> |        | 2p <sub>1/2</sub> |        |
| HAp/G/Cu 17   | 935.02            | 943.60 | 955.07            | 963.73 |                   |        |                   |        |                   |        |                   |        |                   |        |                   |        |
| HAp/G/CuFe    | 933.86            | 943.08 | 953.75            | 963.07 |                   |        |                   |        |                   |        |                   |        | 711.50            | 719.35 | 725.19            | 734.27 |
| HAp/G/CuCo    | 934.69            | 943.12 | 954.64            | 963.08 | 781.71            | 785.72 | 797.59            | 803.68 |                   |        |                   |        |                   |        |                   |        |
| HAp/G/CuNi    | 935.81            | 943.98 | 955.77            | 963.66 |                   |        |                   |        | 857.07            | 862.64 | 874.77            | 880.61 |                   |        |                   |        |

Table S3 Binding energy (eV) value of Cu element for spent catalysts (related to Fig. 13)

| Types of spent catalysts | Cu                  |                  |                     |                  |
|--------------------------|---------------------|------------------|---------------------|------------------|
|                          | $2p_{3/2}$          |                  | $2p_{1/2}$          |                  |
| States of elements       | Cu <sup>+ / 0</sup> | Cu <sup>2+</sup> | Cu <sup>+ / 0</sup> | Cu <sup>2+</sup> |
| HAp/G/Cu 13              | 932.71              | 934.05           | 952.53              | 954.51           |
| HAp/G/Cu 17              | 932.71              | 933.82           | 852.52              | 954.60           |
| HAp/G/Cu 20              | 932.74              | 934.06           | 952.54              | 954.45           |
| HAp/G/CuFe               | 932.82              | 934.43           | 952.63              | 953.68           |
| HAp/G/CuCo               | 932.76              | 934.26           | 952.63              | -                |
| HAp/G/CuNi               | 932.71              | -                | 952.54              | -                |

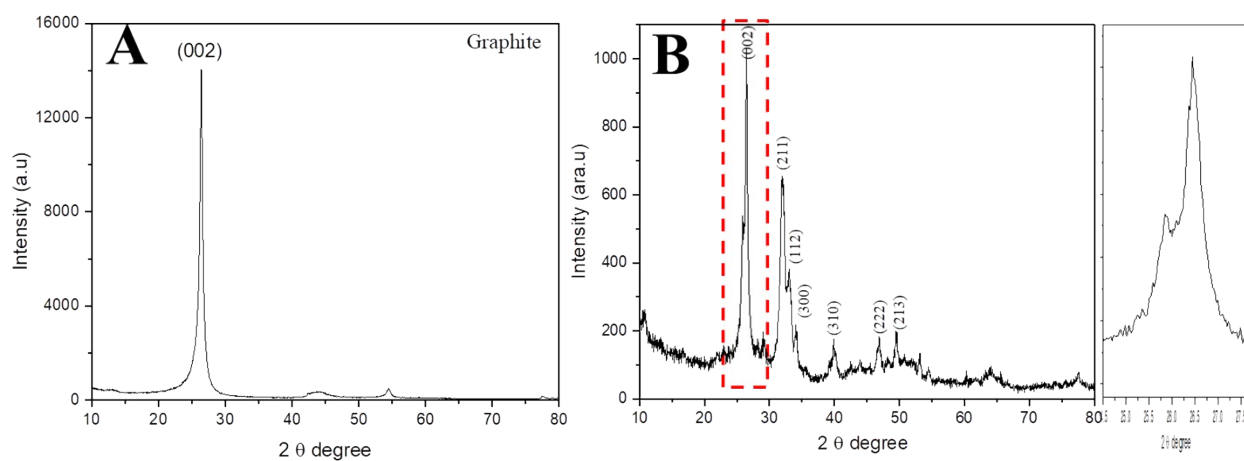

Fig. S1 XRD for (A) bare-Graphite and (B) Hydroxyapatite/Graphite composite (support material)

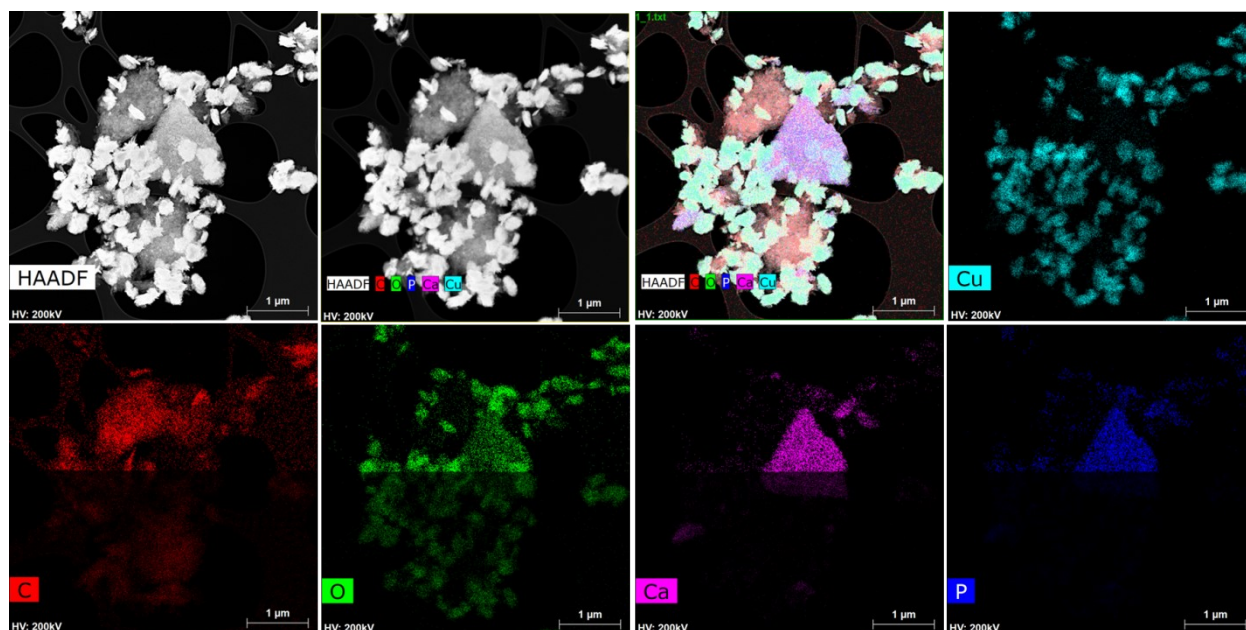

Fig. S2 (a, b) STEM/HAADF image and (c-h) EDS maps analysis of all elements of Cu/HAp/G composite catalyst.

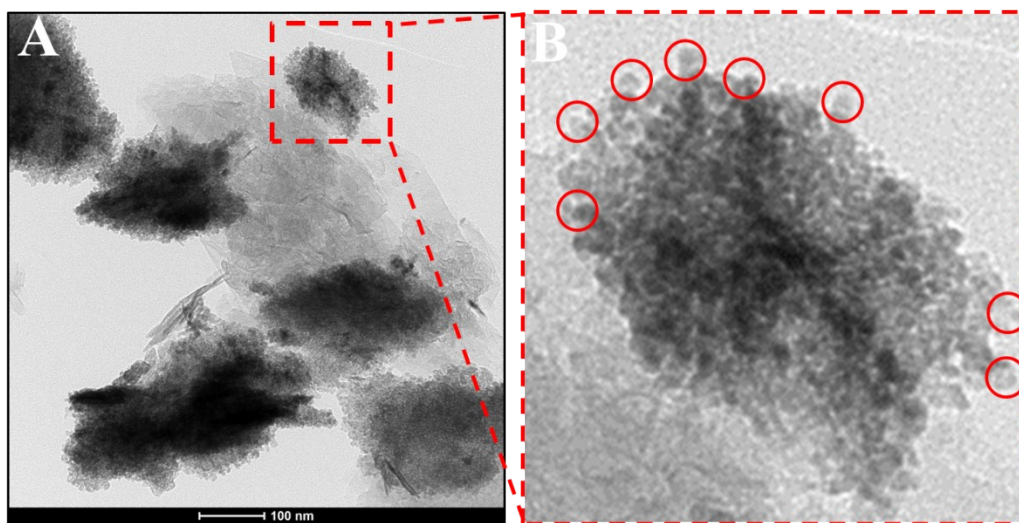

Fig. S3 (A) TEM image and (B) High magnification TEM image of HAp/G/Cu (17wt%) composite catalyst

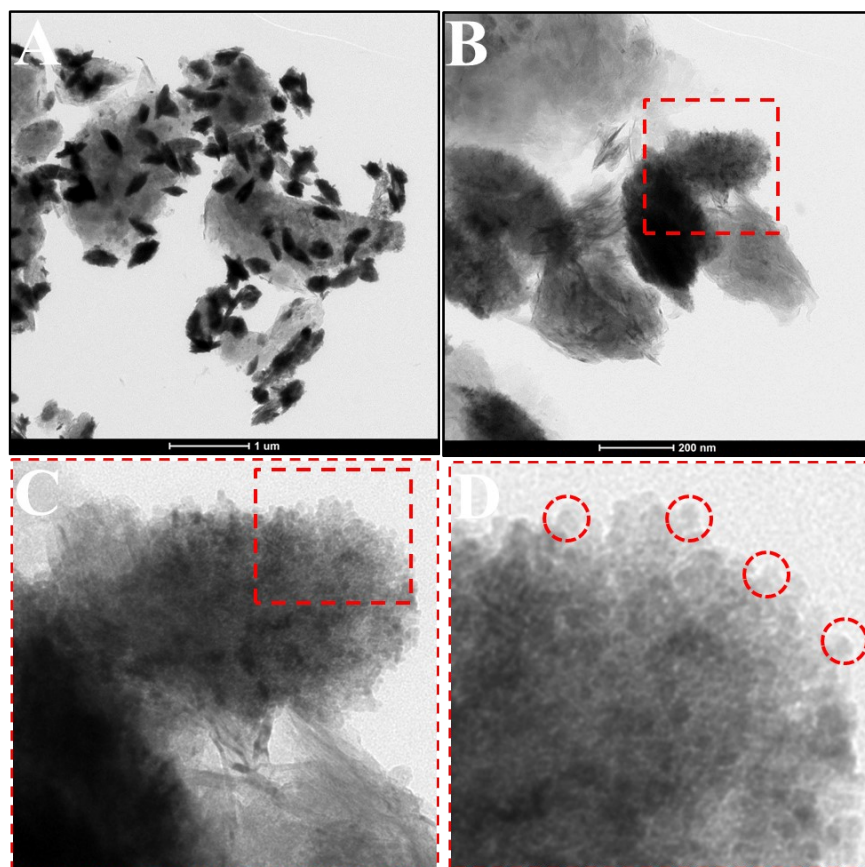

Fig. S4 (A) Low magnification TEM image and (B, C,D) High magnification TEM image of Cu/HAp/G (20 wt%) composite catalyst

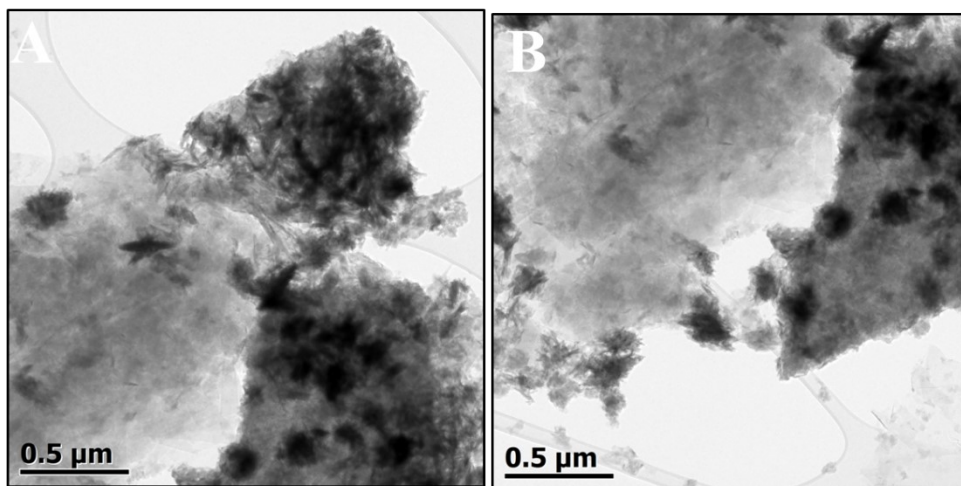

Fig. S5 (A) and (B) TEM images of HAp/G/CuCo composite catalyst

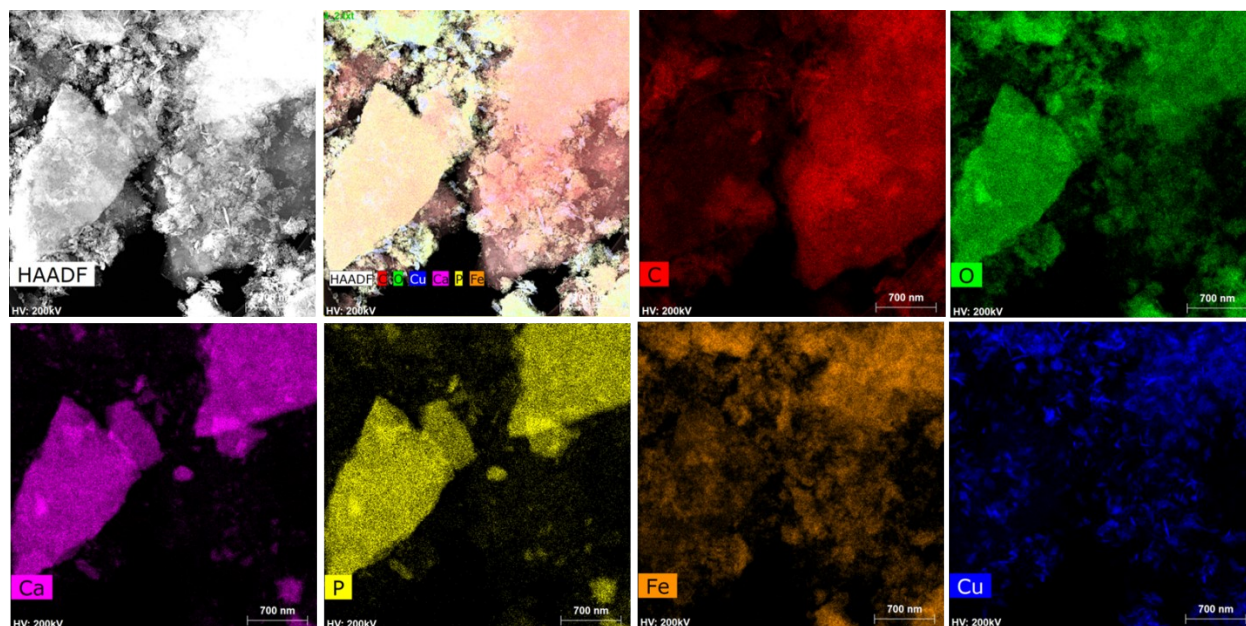

Fig. S6 (a) STEM/HAADF image and (b-h) EDS maps analysis of all elements of HAp/G/CuFe composite catalyst.

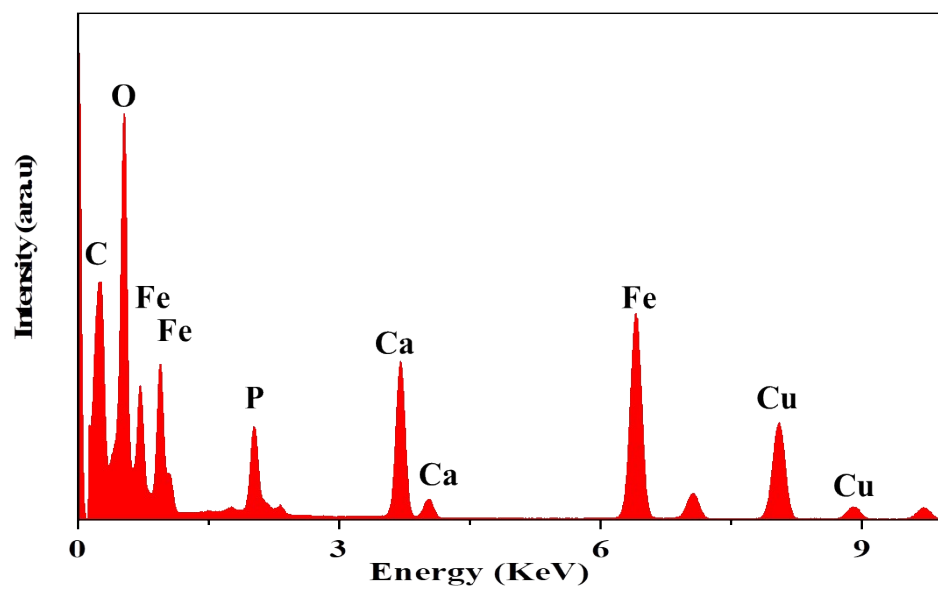

Fig. S7 EDS point analysis for HAp/G/CuFe composite catalyst

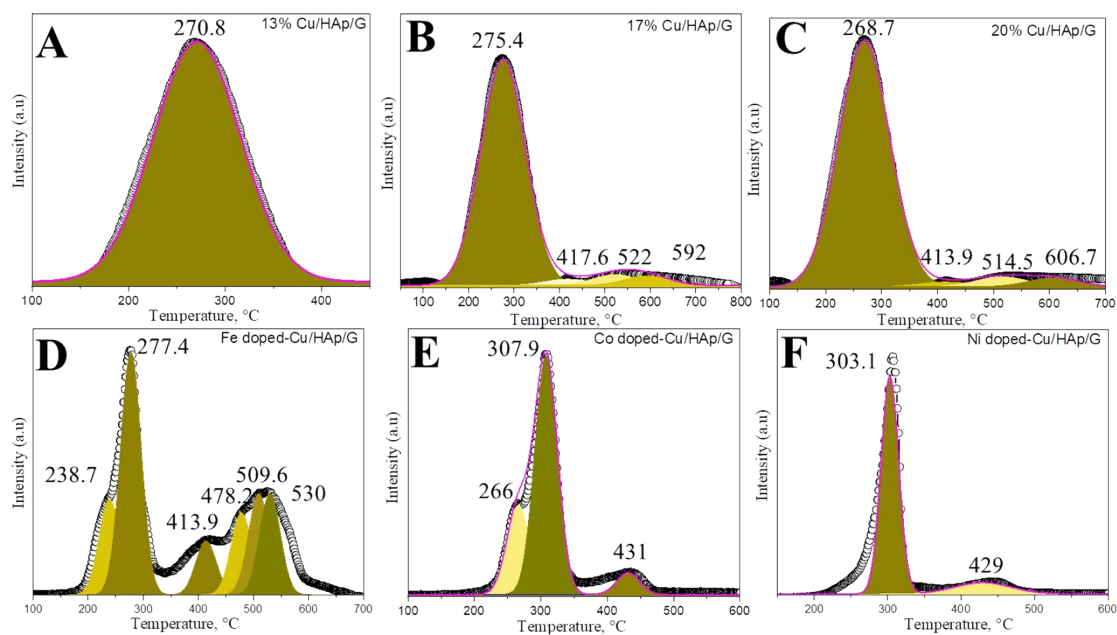

Fig. S8 H<sub>2</sub>-TPR analysis of (A, B and C) un-doped Cu/HAp/G catalysts with different Cu loading and (D, E and F) Fe-, Co-, Ni-promoted Cu/HAp/G composite catalysts.

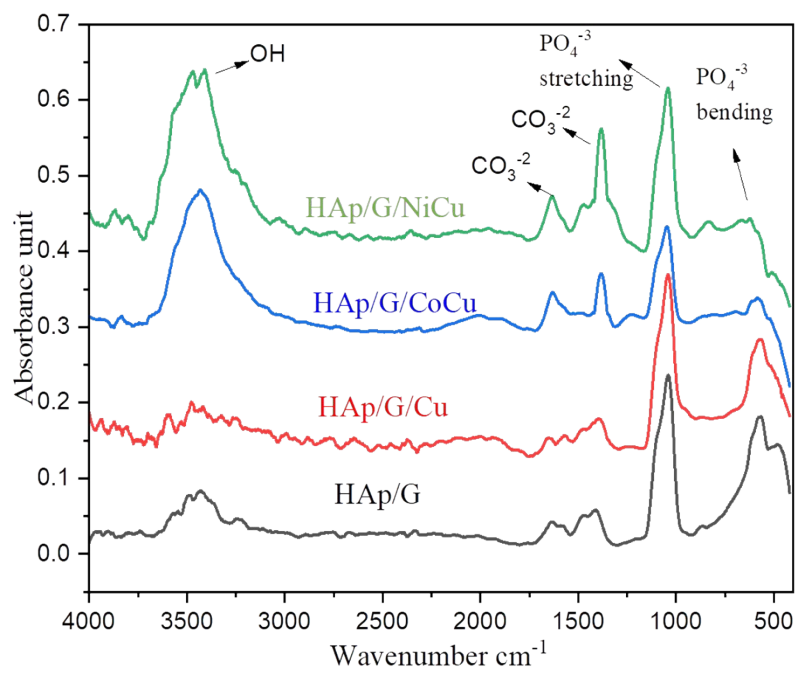

Fig. S9 FTIR of the un-promoted and Fe-, Co-, Ni-promoted HAp/G/Cu composite catalysts.

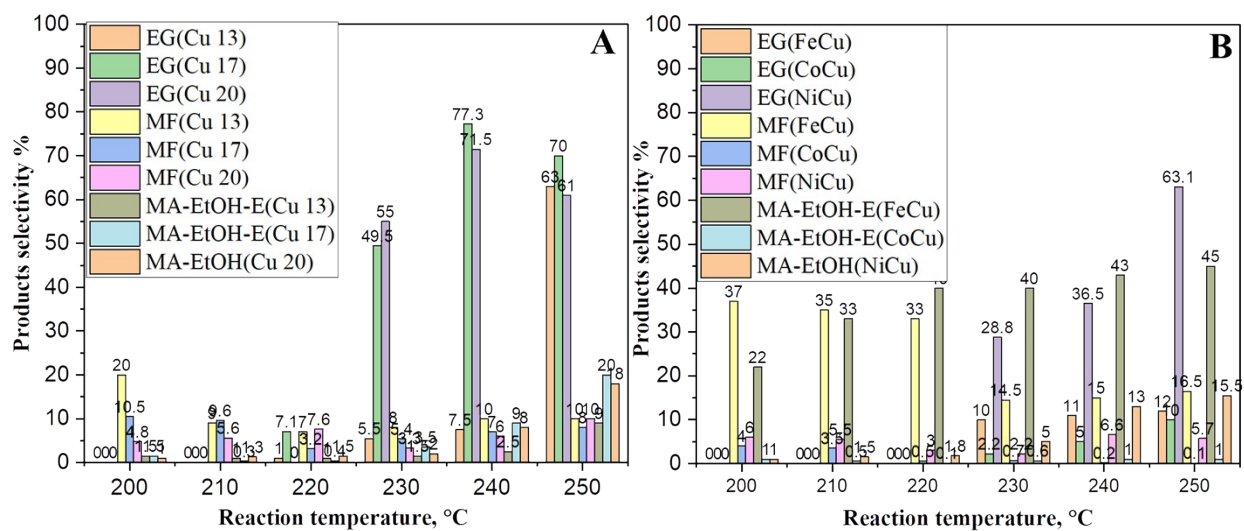

Fig. S10 Selectivity ratio of DMO hydrogenation products of (A) HAp/G/Cu catalysts with different Cu loading and (B) Fe, Co and Ni doped HAp/G/Cu catalysts. The symbols: MF: methyl formate, MA: methyl acetate, EtOH: ethyl alcohol, E: ether and EG: ethylene glycol.

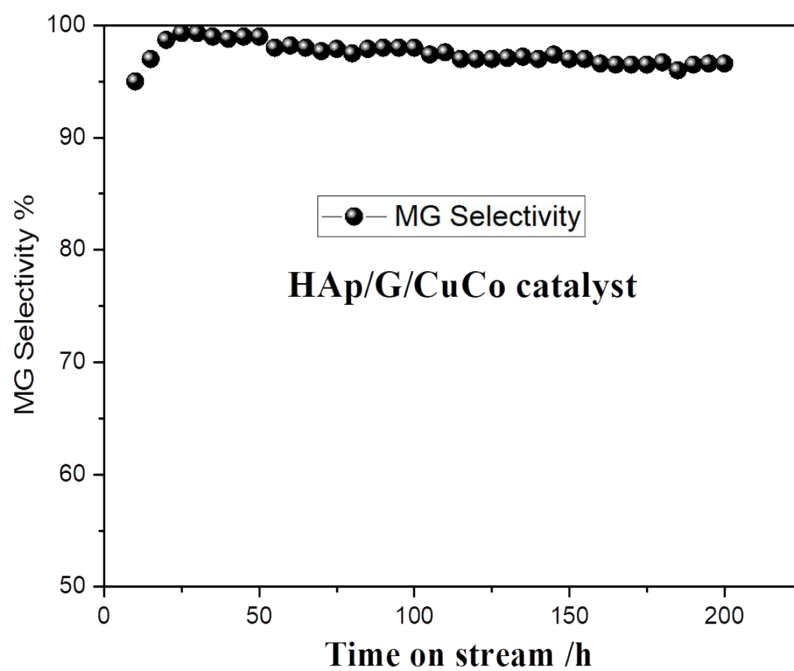

Fig. S11 Stability curve for MG selectivity of the spent HAp/G/CuCo composite catalyst after 200 h of reaction time. Reaction condition:  $\text{H}_2/\text{DMO}$  molar ratio of 200,  $P=2$  MPa,  $T=220$  °C and  $\text{WLHSV}(\text{DMO})=0.85$  g/(g h)
